# Supplementary material for: Neural speech restoration at the cocktail party: Auditory cortex recovers masked speech of both attended and ignored speakers
Source: PubMed Central journal article supplement (PMC7644085; doi:10.1371/journal.pbio.3000883), 2020-10-22

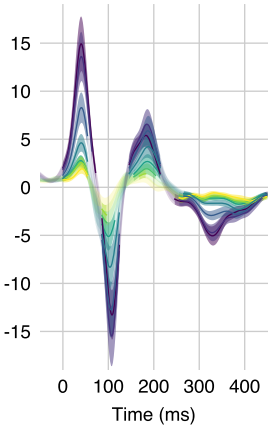

Supplement: pbio.3000883.s002.pdf [file pbio.3000883.s002.pdf]
